# Supplementary material for: Heavy menstrual bleeding among women aged 18–50 years living in Beijing, China: prevalence, risk factors, and impact on daily life
Source: BMC Womens Health. 2019 Feb 4;19:27. doi: 10.1186/s12905-019-0726-1 (PMC6360654; doi:10.1186/s12905-019-0726-1)
Supplement: Supplementary file 1 — Sample size calculation. (PDF 146 kb) [file 12905_2019_726_MOESM1_ESM.pdf]

## **Additional file 1: Sample size calculation <sup>1</sup>**

We calculated a minimum sample size of 2245 participants based on assumptions of 30% prevalence of HMB with a precision of 3% and a survey design effect of 2.58 to account for the interclass correlation of a cluster sampling design. Finally, the number was increased by 20% considering expected losses. Therefore, the ultimate anticipatory sample size was determined to be 2800.

We adopted stratified, cluster sampling strategy. For the start, we calculated a sample size under the assumption of simple random sampling in infinite population, using parameters and formula as presented below:

- $P$ : The expected prevalence of menstrual bleeding. 30% was used according to previous studies;
- $d$ : Absolute precision. Here, we took 3.0%;
- $1 - \alpha$ : Confidence level. We set  $1 - \alpha = 95\%$ , and  $\mu_\alpha = 1.96$ .

The sample size calculated by PASS software is 870 ( $n_1$ ).

Then to correct for the cluster sampling design,  $n_1$  was multiplied by the design effect (deff). The parameters and formula were presented below:

- $m$ : The average sample size of clusters. We assumed the average size of the clusters was 80;
- $\rho$ : Interclass correlation coefficient. Here, we took 0.02 for the study group.

$$\text{deff} = 1 + (m - 1) \times \rho = 1 + (80 - 1) \times 0.02 = 2.58$$

$$n_2 = \text{deff} \times n_1 = 870 \times 2.58 = 2245$$

Finally, the number was increased by 20% considering expected losses.

$$n_3 = n_2 \times (1+20\%) = 2245 \times 1.2 = 2694$$

Therefore, the ultimate anticipatory sample size was determined to be 2800.

## Reference

1. Chopra A, Rao NC, Gupta N, et al. Influence of behavioral determinants on deviation of body mass index among 12-15 years old school children of Panchkula. Epidemiol Health. 2014; 36:e2014021
